# Supplementary material
Source: PubMed Central journal article supplement (PMC4613377)
Supplement: 10.3163.1536-5050.103.4.004.sg001.pdf [file 10.3163.1536-5050.103.4.004.sg001.pdf]

## Identifying and removing duplicate records from systematic review searches

Yoojin Kwon, MLIS; Michelle Lemieux, MLIS; Jill McTavish, PhD, MLIS; Nadine Wathen, PhD

### APPENDIX

#### Search strategies

##### Ovid multifile search

1. exp Health Facility Closure/
2. (hospital\* adj3 (close\* or closur\* or closing)).tw.
3. (ward\* adj3 (close\* or closur\* or closing)).tw.
4. (unit\* adj3 (close\* or closur\* or closing)).tw.
5. (wing\* adj3 (close\* or closur\* or closing)).tw.
6. (partial\* adj2 (close\* or closur\* or closing)).tw.
7. (bay\* adj3 (close\* or closur\* or closing)).tw.
8. (department\* adj3 (close\* or closur\* or closing)).tw.
9. cohorting.tw.
10. or/1-9
11. exp Infection Control/
12. exp Communicable Disease Control/
13. (outbreak adj3 control\*).tw.
14. (infection adj3 control\*).tw.
15. exp Disease Outbreaks/
16. outbreak.tw.
17. exp Disease Transmission, Infectious/
18. (cross adj2 transmi\*).tw.
19. (pathogen\* adj2 spread\*).tw.
20. (pathogen\* adj3 colonis\*).tw.
21. (pathogen\* adj3 coloniz\*).tw.
22. (microb\* adj3 colonis\*).tw.
23. (microb\* adj3 coloniz\*).tw.
24. (mycobacteri\* adj3 colonis\*).tw.
25. (mycobacteri\* adj3 coloniz\*).tw.
26. exp Cross Infection/
27. exp Viruses/
28. Virus Diseases/
29. rhinovirus.tw.
30. exp gram-negative bacteria/
31. exp Influenza, Human/ or (influenza or flu).tw.
32. exp Methicillin-Resistant Staphylococcus aureus/ or exp Staphylococcal Infections/ or (Staphylococcus aureus or mrsa or mssa).tw.

33. (exp Vancomycin Resistance/ and exp Enterococcus/) or (Vancomycin resistant Enterococci or vre).tw.
34. (cre or Carbapenem resistant enterobacteri\*).tw.
35. (cro or Carbapenem Resistant Organism\*).tw.
36. (cpo or Carbapenemase Producing Organism\*).tw.
37. exp Enterobacteriaceae Infections/
38. (ndm-1 or New Delhi metallo-beta-lactamase-1).tw.
39. (esbl or Extended Spectrum Beta Lactamase).tw.
40. Drug Resistance, Microbial/ or exp Drug Resistance, Bacterial/
41. (anti microbial resistan\* or antimicrobial resistan\* or amr).tw.
42. exp Tuberculosis/ or (tb or tuberculosis).tw.
43. exp Nontuberculous Mycobacteria/ or exp Mycobacterium Infections/
44. exp Clostridium difficile/ or (c difficile or cdf or cdi or Clostridium difficile Associated Disease or cdad or bacillus difficilis).tw.
45. exp Norovirus/ or (norovirus or Norwalk virus).tw.
46. exp Caliciviridae Infections/ or calicivirus.tw.
47. exp Rotavirus Infections/ or rotavirus.tw.
48. exp Klebsiella pneumoniae/ or kpc.tw.
49. exp Coronavirus Infections/ or (Middle East respiratory syndrome or MERS-CoV or EMC 2012).tw.
50. (((anti-biotic or antibiotic) adj2 organism\*) or (anti-resistant or antiresistant)).tw.
51. ((healthcare adj2 (associated or acquired)) or hospital acquired infection\* or hai).tw.
52. (nosocomial or (nosocomial adj2 pathogen\*)).tw.
53. exp Communicable Diseases/
54. exp Diarrhea/ or ((hospital adj3 diarrhea\*) or (diarrhea\* adj2 ill\*)).tw.
55. exp Measles/ or (Subacute Measles Encephalitis or sme).tw.
56. oxa 48.tw.
57. exp Common Cold/
58. common cold.tw.
59. exp Adenoviridae/ or exp Mastadenovirus/ or exp Adenoviruses, Human/ or adenovir\*.tw.
60. exp Adenoviridae Infections/
61. exp Severe Acute Respiratory Syndrome/ or (severe acute respiratory syndrome or sars).tw.
62. exp Respiratory Syncytial Viruses/ or exp Respiratory Syncytial Virus Infections/ or (respiratory syncytial virus or rsv).tw.
63. exp Human bocavirus/ or bocavirus.tw.
64. exp Pneumovirus Infections/ or exp Metapneumovirus/ or metapneumovirus.tw.
65. exp Enterovirus Infections/ or exp Enterovirus/ or enterovirus.tw.
66. exp Parvovirus B19, Human/ or Parvoviridae Infections/ or exp Erythema Infectiosum/
67. exp Parechovirus/ or parechovirus.tw.
68. (acute respiratory infection\* or acute respiratory tract infection\*).tw.
69. exp Orthomyxoviridae Infections/
70. (avian and (influenza or flu)).tw.
71. exp Acinetobacter/ or exp Acinetobacter Infections/ or acinetobacter.tw.
72. HCoV EMC 2012.tw.

73. or/11-72
74. 10 and 73
75. 74 use prmz
76. (health facilit\* adj3 (close\* or closur\* or closing)).tw.
77. (hospital\* adj3 (close\* or closur\* or closing)).tw.
78. (ward\* adj3 (close\* or closur\* or closing)).tw.
79. (unit\* adj3 (close\* or closur\* or closing)).tw.
80. (wing\* adj3 (close\* or closur\* or closing)).tw.
81. (partial\* adj2 (close\* or closur\* or closing)).tw.
82. (bay\* adj3 (close\* or closur\* or closing)).tw.
83. ((bay or bays) adj3 contain\*).tw.
84. (department\* adj3 (close\* or closur\* or closing)).tw.
85. cohorting.tw.
86. or/76-85
87. exp infection control/
88. (communicable disease\* adj3 control\*).tw.
89. (outbreak adj3 control\*).tw.
90. outbreak\*.tw.
91. exp disease transmission/
92. (cross adj2 transmi\*).tw.
93. (pathogen\* adj2 spread\*).tw.
94. (pathogen\* adj3 colonis\*).tw.
95. (pathogen\* adj3 coloniz\*).tw.
96. (microb\* adj3 colonis\*).tw.
97. (microb\* adj3 coloniz\*).tw.
98. (mycobacteri\* adj3 colonis\*).tw.
99. exp viruses/
100. exp virus infection/
101. rhinovirus.tw.
102. exp Gram negative bacterium/
103. exp influenza/ or (influenza or flu).tw.
104. exp methicillin resistant Staphylococcus aureus/ or Staphylococcus infection/ or (Staphylococcus aureus or mrsa or mssa).tw.
105. exp Enterococcus/ or (Vancomycin resistant Enterococci or vre).tw.
106. (cre or Carbapenem resistant enterobacteri\*).tw.
107. exp Enterobacteriaceae infection/
108. (cro or Carbapenem Resistant Organism\*).tw.
109. (cpo or Carbapenemase Producing Organism\*).tw.
110. (ndm-1 or New Delhi metallo-beta-lactamase-1).tw.
111. (esbl or Extended Spectrum Beta Lactamase).tw.
112. exp antibiotic resistance/
113. (drug adj2 resist\*).tw.
114. (anti microbial resistan\* or antimicrobial resistan\* or amr).tw.
115. (((anti-biotic or antibiotic) adj2 organism\*) or (anti-resistant or antiresistant)).tw.
116. exp Tuberculosis/ or (tb or tuberculosis).tw.

117. exp atypical Mycobacterium/ or exp mycobacteriosis/
118. exp Clostridium difficile/ or (c difficile or cdf or cdi or Clostridium difficile Associated Disease or cdad or bacillus difficilis).tw.
119. exp Norovirus/ or (norovirus or Norwalk virus).tw.
120. exp calicivirus infection/ or calicivirus.tw.
121. exp Rotavirus infection/ or rotavirus.tw.
122. exp Klebsiella pneumoniae/ or kpc.tw.
123. exp Coronavirus infection/ or (Middle East respiratory syndrome or MERS-CoV or EMC 2012).tw.
124. exp hospital infection/ or ((healthcare adj2 (associated or acquired)) or hospital acquired infection\* or hai).tw.
125. (nosocomial or (nosocomial adj2 pathogen\*)).tw.
126. exp communicable disease/
127. exp diarrhea/ or ((hospital adj3 diarrhea\*) or (diarrhea\* adj2 ill\*)).tw.
128. exp measles/ or (Subacute Measles Encephalitis or sme).tw.
129. oxa 48.tw.
130. exp common cold/ or common cold.tw.
131. exp Adenovirus/ or exp Mastadenovirus/ or exp Human adenovirus/ or adenovir\*.tw.
132. exp adenovirus infection/
133. exp Severe Acute Respiratory Syndrome/ or (severe acute respiratory syndrome or sars).tw.
134. exp Respiratory syncytial pneumovirus/ or exp respiratory syncytial virus infection/ or (respiratory syncytial virus or rsv).tw.
135. exp bocavirus/ or bocavirus.tw.
136. exp Pneumovirus infection/ or exp metapneumovirus/ or (pneumovirus or metapneumovirus).tw.
137. exp Enterovirus infection/ or exp Enterovirus/ or enterovirus.tw.
138. exp Human parvovirus B19/ or exp parvovirus infection/ or exp erythema infectiosum/
139. exp Parechovirus/ or parechovirus.tw.
140. (acute respiratory infection\* or acute respiratory tract infection\*).tw.
141. exp orthomyxovirus infection/
142. (avian and (influenza or flu)).tw.
143. exp Acinetobacter Infections/ or acinetobacter.tw.
144. HCoV EMC 2012.tw.
145. or/87-144
146. 86 and 145
147. 146 use oemez
148. 75 or 147
149. remove duplicates from 148

**EBSCO CINAHL**

| #   | Query                                                                                                                       | Limiters/Expanders                      |
|-----|-----------------------------------------------------------------------------------------------------------------------------|-----------------------------------------|
| S1  | health facilit* N3 (close* OR clousur* or closing)                                                                          | Search modes - Find all my search terms |
| S2  | hospital* N3 (close* OR clousur* or closing)                                                                                | Search modes - Find all my search terms |
| S3  | ward* N3 (close* OR clousur* or closing)                                                                                    | Search modes - Find all my search terms |
| S4  | unit* N3 (close* OR clousur* or closing)                                                                                    | Search modes - Find all my search terms |
| S5  | wing* N3 (close* OR clousur* or closing)                                                                                    | Search modes - Find all my search terms |
| S6  | partial* N2 (close* OR clousur* or closing)                                                                                 | Search modes - Find all my search terms |
| S7  | bay* N3 (close* OR clousur* or closing)                                                                                     | Search modes - Find all my search terms |
| S8  | (bay OR bays) AND contain*                                                                                                  | Search modes - Find all my search terms |
| S9  | cohorting                                                                                                                   | Search modes - Find all my search terms |
| S10 | S1 OR S2 OR S3 OR S4 OR S5 OR S6 OR S7 OR S8 OR S9                                                                          | Search modes - Find all my search terms |
| S11 | (MH "Infection Control+")                                                                                                   | Search modes - Find all my search terms |
| S12 | communicable disease* N3 control*                                                                                           | Search modes - Find all my search terms |
| S13 | outbreak N3 control*                                                                                                        | Search modes - Find all my search terms |
| S14 | outbreak                                                                                                                    | Search modes - Find all my search terms |
| S15 | (MH "Disease Transmission+")                                                                                                | Search modes - Find all my search terms |
| S16 | cross N2 transmi*                                                                                                           | Search modes - Find all my search terms |
| S17 | pathogen* N2 spread*                                                                                                        | Search modes - Find all my search terms |
| S18 | pathogen* N2 colonis*                                                                                                       | Search modes - Find all my search terms |
| S19 | pathogen* N2 coloniz*                                                                                                       | Search modes - Find all my search terms |
| S20 | microb* N2 colonis*                                                                                                         | Search modes - Find all my search terms |
| S21 | microb* N2 coloniz*                                                                                                         | Search modes - Find all my search terms |
| S22 | mycobacteri* N2 coloniz*                                                                                                    | Search modes - Find all my search terms |
| S23 | (MH "Viruses+")                                                                                                             | Search modes - Find all my search terms |
| S24 | rhinovirus*                                                                                                                 | Search modes - Find all my search terms |
| S25 | (MH "Gram-Negative Bacteria+")                                                                                              | Search modes - Find all my search terms |
| S26 | (MH "Influenza+") OR influenza OR flu                                                                                       | Search modes - Find all my search terms |
| S27 | (MH "Methicillin-Resistant Staphylococcus Aureus") OR staphylococcus infection OR ((staphylococcus aureus or mrsa or mssa)) | Search modes - Find all my search terms |
| S28 | (MH "Enterococcus+") OR vancomycin resistant enterococci OR vre                                                             | Search modes - Find all my search terms |
| S29 | (MH "Drug Resistance, Microbial+")                                                                                          | Search modes - Find all my search terms |
| S30 | (MH "Drug Resistance, Microbial+") OR drug N2 resist* OR ((anti microbial resistan* or antimicrobial resistan* or amr))     | Search modes - Find all my search terms |
| S31 | cre OR carbapenam resistant enterobacteri*                                                                                  | Search modes - Find all my search terms |
| S32 | (MH "Enterobacteriaceae Infections+")                                                                                       | Search modes - Find all my search terms |
| S33 | cro OR carbapenam resistant organism*                                                                                       | Search modes - Find all my search terms |
| S34 | cpo OR carbapenamase producing organism*                                                                                    | Search modes - Find all my search terms |
| S35 | esbl OR extended spectrum beta lactamase                                                                                    | Search modes - Find all my search terms |
| S36 | (MH "Tuberculosis+") OR tb OR tuberculosis                                                                                  | Search modes - Find all my search terms |

|     |                                                                                                                             |                                         |
|-----|-----------------------------------------------------------------------------------------------------------------------------|-----------------------------------------|
| S37 | (MH "Mycobacterium Infections+")                                                                                            | Search modes - Find all my search terms |
| S38 | (MH "Clostridium Difficile") OR ( (c difficile or cdi or clostridium difficile associated disease or cdad) )                | Search modes - Find all my search terms |
| S39 | (MH "Caliciviridae Infections+") OR calicivirus                                                                             | Search modes - Find all my search terms |
| S40 | ( (MH "Rotavirus Infections") OR (MH "Rotaviruses") ) OR rotavirus                                                          | Search modes - Find all my search terms |
| S41 | (MH "Klebsiella Infections") OR kpc                                                                                         | Search modes - Find all my search terms |
| S42 | (MH "Coronavirus Infections") OR (MH "Coronavirus") OR ( (Middle East respiratory syndrome or MERS-CoV or EMC 2012) )       | Search modes - Find all my search terms |
| S43 | (MH "Cross Infection") OR (MH "Communicable Diseases")                                                                      | Search modes - Find all my search terms |
| S44 | hospital infection OR ( healthcare N2 (associated or acquired) ) OR ( hospital acquired infection* or hai )                 | Search modes - Find all my search terms |
| S45 | nosocomial AND (nosocomial N2 pathogen*)                                                                                    | Search modes - Find all my search terms |
| S46 | (MH "Diarrhea") OR hospital N3 diarrhea* OR diarrhea* N2 ill*                                                               | Search modes - Find all my search terms |
| S47 | (MH "Measles+") OR subacute measles encephalitis OR sme                                                                     | Search modes - Find all my search terms |
| S48 | oxa 48                                                                                                                      | Search modes - Find all my search terms |
| S49 | (MH "Common Cold") OR common cold                                                                                           | Search modes - Find all my search terms |
| S50 | mastadenovir* OR adenovir*                                                                                                  | Search modes - Find all my search terms |
| S51 | Severe Acute Respiratory Syndrome OR sars                                                                                   | Search modes - Find all my search terms |
| S52 | (MH "Respiratory Syncytial Viruses") OR (MH "Respiratory Syncytial Virus Infections") OR respiratory syncytial virus OR rsv | Search modes - Find all my search terms |
| S53 | bocavirus                                                                                                                   | Search modes - Find all my search terms |
| S54 | pneumovirus OR metapneumovirus                                                                                              | Search modes - Find all my search terms |
| S55 | (MH "Enterovirus") OR (MH "Enterovirus Infections") OR enterovirus                                                          | Search modes - Find all my search terms |
| S56 | (MH "Parvovirus Infections") OR (MH "Erythema Infectiosum")                                                                 | Search modes - Find all my search terms |
| S57 | (MH "Parvovirus Infections") OR (MH "Erythema Infectiosum") or parvovirus                                                   | Search modes - Find all my search terms |
| S58 | acute respiratory infection* OR acute respiratory tract infection*                                                          | Search modes - Find all my search terms |
| S59 | orthomyxovir*                                                                                                               | Search modes - Find all my search terms |
| S60 | (avian and (influenza or flu))                                                                                              | Search modes - Find all my search terms |
| S61 | ndm-1 OR New Delhi Metallo-beta-lactamase-1                                                                                 | Search modes - Find all my search terms |
| S62 | (MH "Acinetobacter Infections")                                                                                             | Search modes - Find all my search terms |
| S63 | HCoV EMC 2012                                                                                                               | Search modes - Find all my search terms |
| S64 | acinetobacter                                                                                                               | Search modes - Find all my search terms |

|     |                                                                                                                                                                                                                                                                                                                                                                                                                   |                                                                               |
|-----|-------------------------------------------------------------------------------------------------------------------------------------------------------------------------------------------------------------------------------------------------------------------------------------------------------------------------------------------------------------------------------------------------------------------|-------------------------------------------------------------------------------|
| S65 | S11 OR S12 OR S13 OR S14 OR S15 OR S16<br>OR S17 OR S18 OR S19 OR S20 OR S21 OR<br>S22 OR S23 OR S24 OR S25 OR S26 OR S27<br>OR S28 OR S29 OR S30 OR S31 OR S32 OR<br>S33 OR S34 OR S35 OR S36 OR S37 OR S38<br>OR S39 OR S40 OR S41 OR S42 OR S43 OR<br>S44 OR S45 OR S46 OR S47 OR S48 OR S49<br>OR S50 OR S51 OR S52 OR S53 OR S54 OR<br>S55 OR S56 OR S57 OR S58 OR S59 OR S60<br>OR S61 OR S62 OR S63 OR S64 | Search modes - Find all my search terms                                       |
| S66 | (S10 AND S65)                                                                                                                                                                                                                                                                                                                                                                                                     | Search modes - Find all my search terms                                       |
| S67 | (S10 AND S65)                                                                                                                                                                                                                                                                                                                                                                                                     | Limiters - Exclude MEDLINE records<br>Search modes - Find all my search terms |

### Procedure used to create gold standard sets

1. Sort by Title> Primary> sort ascending order> use conditional formatting to highlight duplicates
2. Sort by Authors, Primary, sort ascending order, use conditional formatting to highlight duplicates
3. Insert 2 columns, in one use formula=left(Dn,30) to truncate Primary title (noticed that punctuation at end sometimes negatively affected conditional formatting, #30 completely arbitrary), in second column use=ROWn=ROW(n-1), conditional formatting to highlight TRUE, scanned list
4. Replaced equation from #3 with=G2&" "&J2" "&K2" "&L2 (to combine together Journal title, vol, issue, start page), sort ascending, in second column use=ROWn=ROW(n-1), conditional formatting to highlight TRUE, scanned list
5. Sort by Authors, Primary, manually scanned to check for same primary author
