# Supplementary material
Source: PubMed Central journal article supplement (PMC4613377)
Supplement: 10.3163.1536-5050.103.4.004.sg002.pdf [file 10.3163.1536-5050.103.4.004.sg002.pdf]

## Identifying and removing duplicate records from systematic review searches

Yoojin Kwon, MLIS; Michelle Lemieux, MLIS; Jill McTavish, PhD, MLIS; Nadine Wathen, PhD

---

**Table 1**

Time taken to de-duplicate

---

|               | <b>Time</b>        |
|---------------|--------------------|
| Gold standard | 4 hours 45 minutes |
| Ovid          | Under 3 minutes    |
| EBSCO         | Under 3 minutes    |
| RefWorks      | 10 minutes         |
| EndNote       | 3 minutes          |
| Mendeley      | 5 minutes          |

---
