# Supplementary material
Source: PubMed Central journal article supplement (PMC4613377)
Supplement: 10.3163.1536-5050.103.4.004.sg003.pdf [file 10.3163.1536-5050.103.4.004.sg003.pdf]

## Identifying and removing duplicate records from systematic review searches

Yoojin Kwon, MLIS; Michelle Lemieux, MLIS; Jill McTavish, PhD, MLIS; Nadine Wathen, PhD

---

**Table 3**  
Percentage of false negatives and positives

---

|                | <b>False negatives (% of total citations before deduplication)</b> | <b>False positives (% of total citations before deduplication)</b> |
|----------------|--------------------------------------------------------------------|--------------------------------------------------------------------|
| Ovid           | 7%                                                                 | 0                                                                  |
| Ovid and EBSCO | 7%                                                                 | 3.0%                                                               |
| RefWorks       | 7%                                                                 | 0.2%                                                               |
| EndNote        | 17%                                                                | 0.3%                                                               |
| Mendeley       | 3%                                                                 | 0.3%                                                               |

---

\* False positives are duplicate citations that were deleted but should not have been and false negatives are duplicate citations that should have been deleted but were not.

---
